# Supplementary material for: Effect of Lactobacillus acidophilus fermentation on the composition of chlorogenic acids and anti-hyperuricemia activity of Artemisia selengensis Turcz
Source: Royal Society of Chemistry journal article supplement (doi:10.1039/d2fo01854c), 2022-01-01
Supplement: d2fo01854c1.pdf [file d2fo01854c1.pdf]

## **Supplementary Materials**

### **Figure Captions**

**Fig. S1.** HPLC diagram of 9 standard substances

**Fig. S2.** UPLC-MS/MS diagram of potential XOD inhibitors in ASTE/FASTE

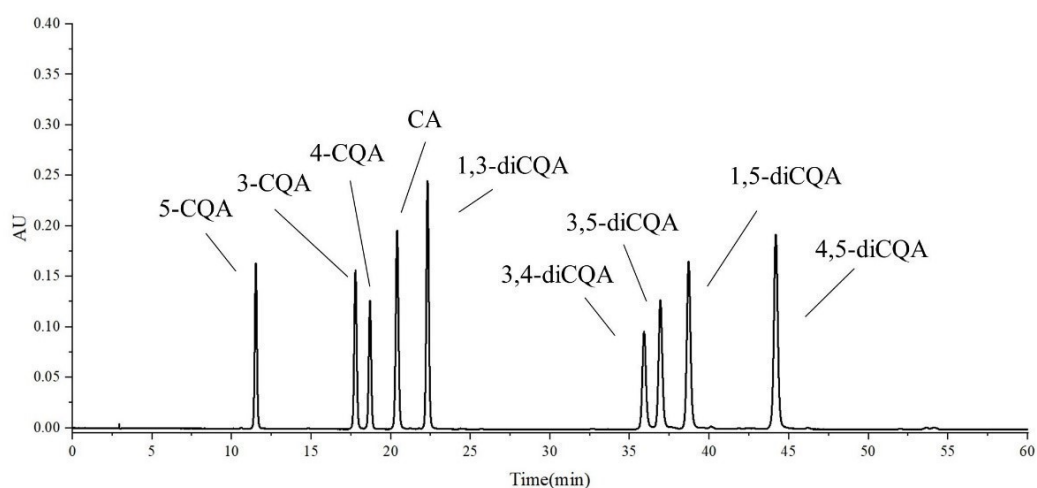

Fig. S1.

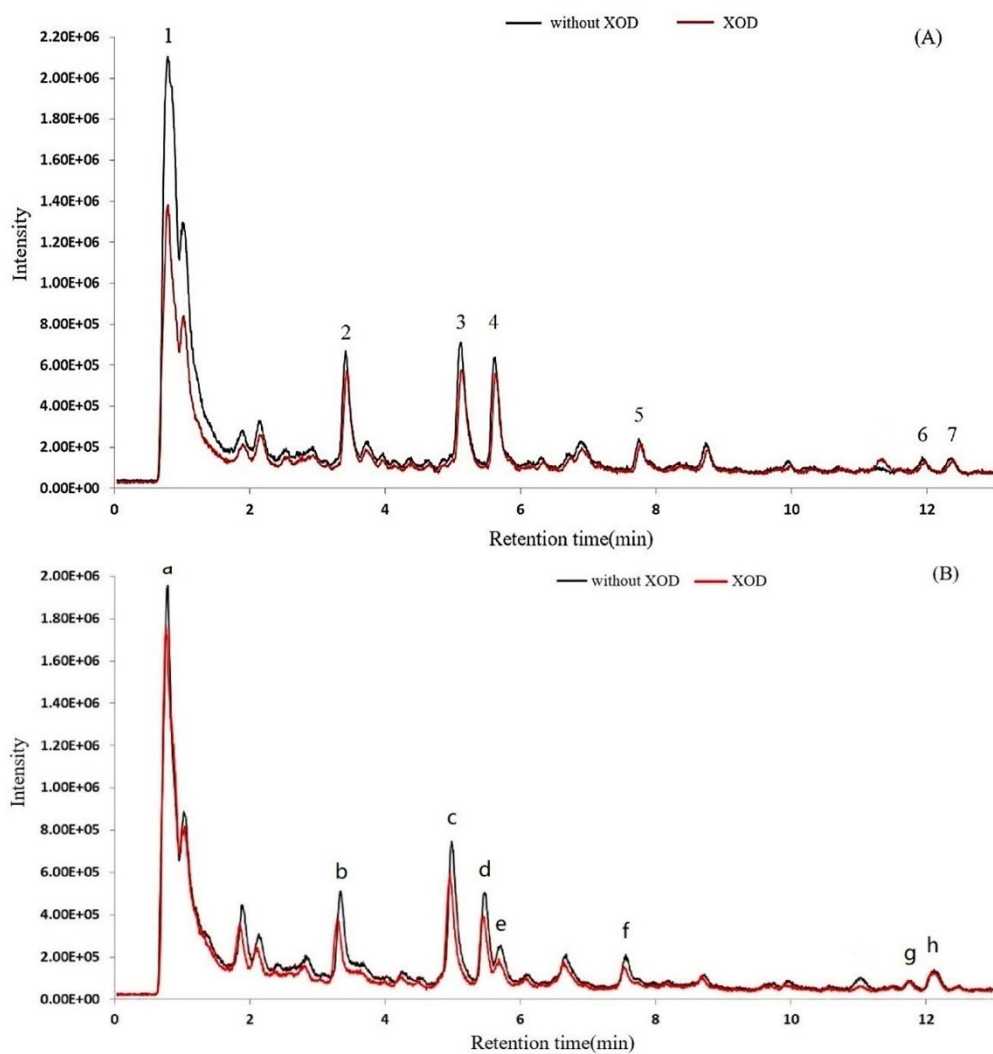

Fig. S2.

Table S1. Identification of XOD inhibitors in ASTE by UPLC-MS/MS

| Peak | RT/min | MS[M-H] <sup>-</sup> | MS <sup>2</sup>                                                              | Molecular                                       | Compound                     |
|------|--------|----------------------|------------------------------------------------------------------------------|-------------------------------------------------|------------------------------|
| 1    | 0.83   | 191.0567             | 173.0517, 127.0457, 93.0397, 85.0345, 73.0343, 59.0179                       | C <sub>7</sub> H <sub>12</sub> O <sub>6</sub>   | Quinic acid                  |
| 2    | 3.35   | 353.0900             | 191.0638, 179.0419, 173.0314, 161.0314, 135.0512                             | C <sub>16</sub> H <sub>18</sub> O <sub>9</sub>  | 5-CQA                        |
| 3    | 4.98   | 353.0897             | 191.0638                                                                     | C <sub>16</sub> H <sub>18</sub> O <sub>9</sub>  | 3-CQA and (or) 4-CQA         |
| 4    | 5.51   | 353.0901             | 191.0636, 179.0418, 173.0525, 161.0316, 135.1511, 111.0505, 93.0397, 85.0348 | C <sub>16</sub> H <sub>18</sub> O <sub>9</sub>  | 1-CQA                        |
| 5    | 7.61   | 515.1216             | 353.0978, 191.0635, 179.0421, 161.0307, 135.0512                             | C <sub>25</sub> H <sub>24</sub> O <sub>12</sub> | 3,4-diCQA                    |
| 6    | 11.83  | 515.1216             | 353.0970, 335.0860, 191.0618, 179.0413, 173.0508                             | C <sub>25</sub> H <sub>24</sub> O <sub>12</sub> | 3,5-diCQA and (or) 1,5-diCQA |
| 7    | 12.24  | 515.1208             | 353.0970, 191.0619, 179.0405, 135.0488                                       | C <sub>25</sub> H <sub>24</sub> O <sub>12</sub> | 4,5-diCQA                    |

Table S2. Identification of XOD inhibitors in FASTE by UPLC-MS/MS

| peak | RT/min | MS[M-H] <sup>-</sup> | MS <sup>2</sup>                                                      | Molecular                                       | Compound                     |
|------|--------|----------------------|----------------------------------------------------------------------|-------------------------------------------------|------------------------------|
| a    | 0.82   | 191.0408             | 93.0366, 87.01081, 85.0316, 67.0210, 59.0157                         | C <sub>7</sub> H <sub>12</sub> O <sub>6</sub>   | Quinic acid                  |
| b    | 3.35   | 353.0865             | 191.0589, 179.0376, 173.0483, 161.0267, 135.0474                     | C <sub>16</sub> H <sub>18</sub> O <sub>9</sub>  | 5-CQA                        |
| c    | 5.02   | 353.0864             | 191.0591                                                             | C <sub>16</sub> H <sub>18</sub> O <sub>9</sub>  | 3-CQA and 4-CQA              |
| d    | 5.53   | 351.0861             | 191.0586, 179.0378, 173.0483, 135.0473, 93.0367, 59.0154             | C <sub>16</sub> H <sub>18</sub> O <sub>9</sub>  | 1-CQA                        |
| e    | 5.72   | 179.0958             | 135.0474, 134.0394, 89.0415                                          | C <sub>9</sub> H <sub>8</sub> O <sub>4</sub>    | CA                           |
| f    | 7.57   | 515.1177             | 353.0918, 335.0823, 191.0591, 179.0377, 173.0483, 161.0267, 135.0471 | C <sub>25</sub> H <sub>24</sub> O <sub>12</sub> | 3,4-diCQA                    |
| g    | 11.80  | 515.1174             | 353.0920, 191.0591, 179.0378, 173.0481, 161.0264, 155.0362, 135.0476 | C <sub>25</sub> H <sub>24</sub> O <sub>12</sub> | 3,5-diCQA and (or) 1,5-diCQA |
| h    | 12.05  | 515.1177             | 353.0915, 191.0595, 179.0390                                         | C <sub>25</sub> H <sub>24</sub> O <sub>12</sub> | 4,5-diCQA                    |
